# Supplementary material for: Lmx1b Influences Correct Post-mitotic Coding of Mesodiencephalic Dopaminergic Neurons
Source: Front Mol Neurosci. 2019 Mar 14;12:62. doi: 10.3389/fnmol.2019.00062 (PMC6427837; doi:10.3389/fnmol.2019.00062)
Supplement: TABLE S1 — Absolute numbers of cells counted. (A) The actual amount of TH+ cells counted in total and the SNc and VTA in 3-month-old wildtype and Lmx1b cKO used for Figure 4. (B) The total amount of TH+cells counted in 12-month-old Pitx3Cre/+; Lmx1b +/+ and Pitx3Cre/+; Lmx1b L/L and subdivided in the SNc and VTA, used for Figure 5. (C) Actual cell numbers used for the graphs in Figure 9 in 3-month-old Lmx1b cKO and wildtypes. (D) Actual amount of cells counted in the Pitx3Cre/Cre; Lmx1b +.+ and the Pitx3Cre/Cre; Lmx1b L/L at 3 months of age and used for Figure 11. [file Table_1.XLSX]

## Sheet: Sheet1
Figure 4					Figure 5					Figure 9						Figure 11
Genotype	Total TH	SNC	VTA		Genotype	Total TH	SNC	VTA		Genotype	SNC		VTA			Genotype	TH+	TH+AHD2+
Wildtype	1986	1254	732		Wildtype	1909	1059	850			TH+AHD2+	TH+AHD2-	TH+AHD2+	TH+AHD2-		Pitx3 KO	612	133
Wildtype	1908	1209	699		Wildtype	2142	1296	846		Wildtype	628	626	235	497		Pitx3 KO	585	131
Wildtype	1904	1219	685		Wildtype	1804	993	811		Wildtype	563	646	231	468		Pitx3 KO	649	115
Lmx1b cKO	1637	1022	615		Wildtype	1959	1144	815		Wildtype	610	609	200	485		Pitx3/ Lmx1b KO	729	275
Lmx1b cKO	1745	1177	568		Lmx1b cKO	1745	975	770		Lmx1b cKO	491	531	250	365		Pitx3/ Lmx1b KO	712	130
Lmx1b cKO	1553	1032	521		Lmx1b cKO	1610	871	739		Lmx1b cKO	544	633	163	405		Pitx3/ Lmx1b KO	702	162
					Lmx1b cKO	1926	1075	851		Lmx1b cKO	459	573	134	387
					Lmx1b cKO	1780	903	877
